# Supplementary material for: Robust Significance Analysis of Microarrays by Minimumβ-Divergence Method
Source: Hindawi journal article supplement (doi:10.1155/2017/5310198), 2017-01-01
Supplement: f7 [file 5310198.f7.pdf]

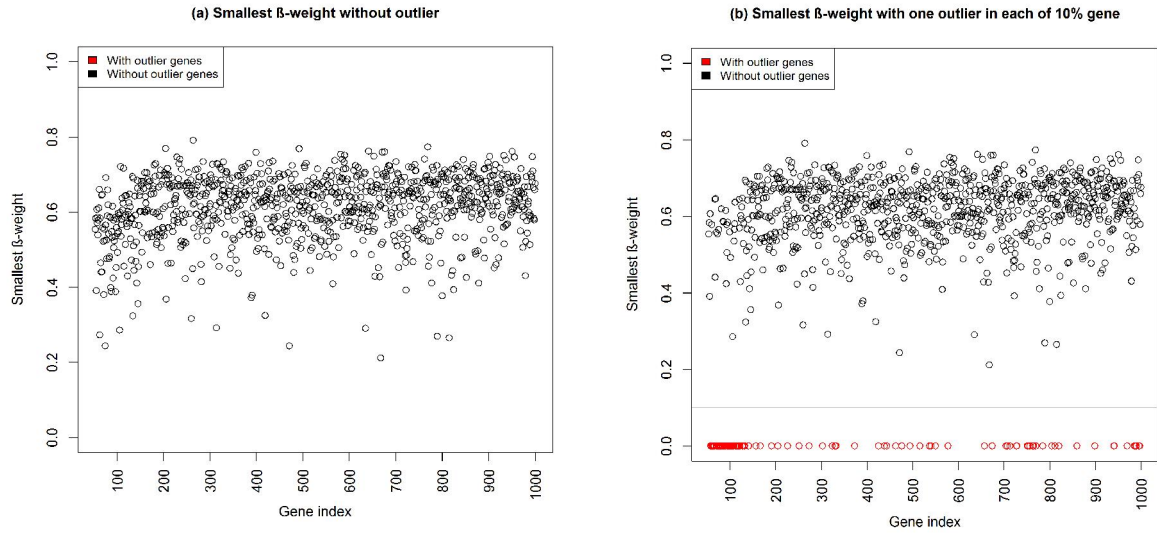

**Figure S1. Plot of smallest  $\beta$ -weight for simulation study 1.** (a) In absence of outliers. (b) In presence of one outlier in each of 10% genes. Where the smallest  $\beta$ -weight represents the minimum value of 20  $\beta$ -weights for 20 samples for each gene. The outlier genes are indicated in red color. The gray line indicate the maximum value of cutoff,  $\lambda=0.13$  for outlying genes.

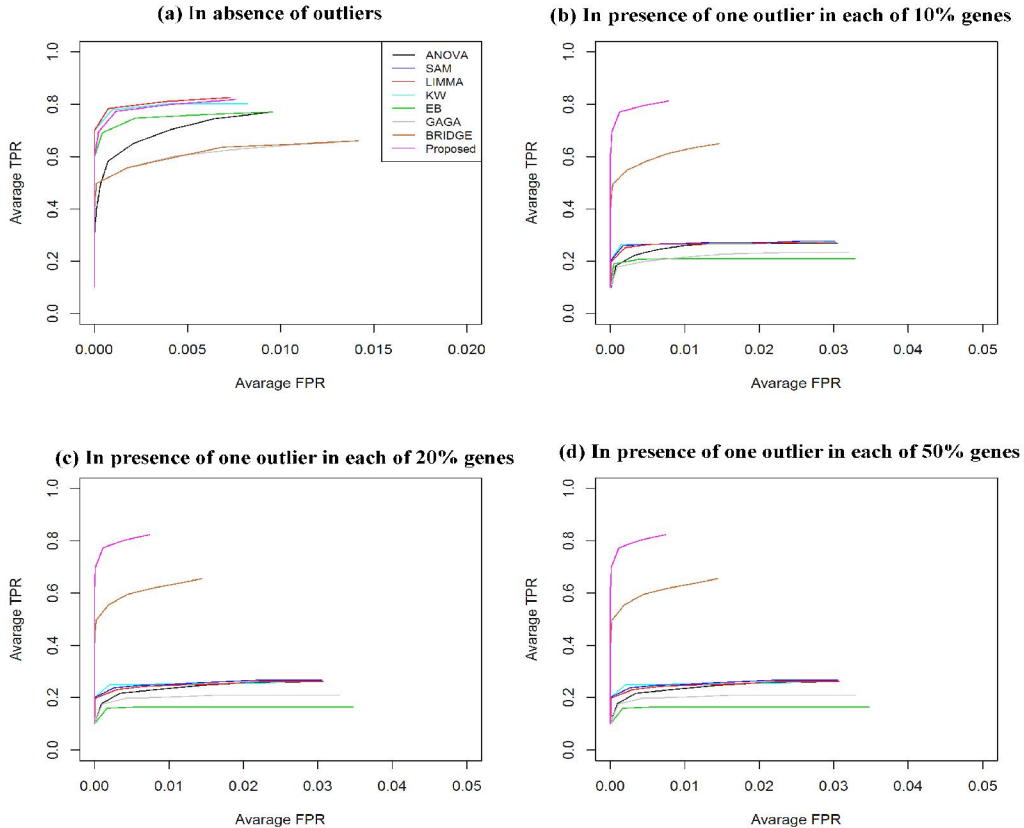

**Figure S2. Performance evaluation using ROC curve produced by different methods with large-sample case ( $n_1 = n_2 = 25$ ).** (a) In absence of outliers. (b) In presence of one outlier in each of 10% genes (c) In presence of one outlier in each of 20% genes. (d) In presence of one outlier in each of 50% genes.

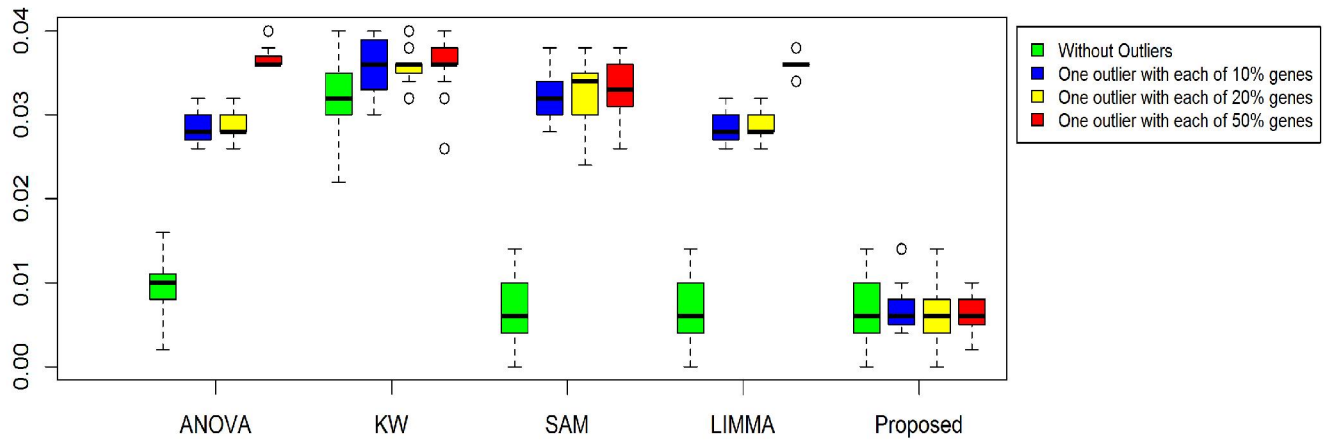

**Figure S3. Performance evaluation using boxplot of MER values estimated by five methods for small-sample case ( $n_1=n_2=n_3=n_4=3$ ).** Boxplot of MER values in absence and presence of one outlier in each of 10%, 20% and 50% genes for small-sample case ( $n_1=n_2=n_3=n_4=3$ ). The MER values were calculated by five methods (ANOVA, KW, SAM, LIMMA and Proposed) based on top 200 genes.

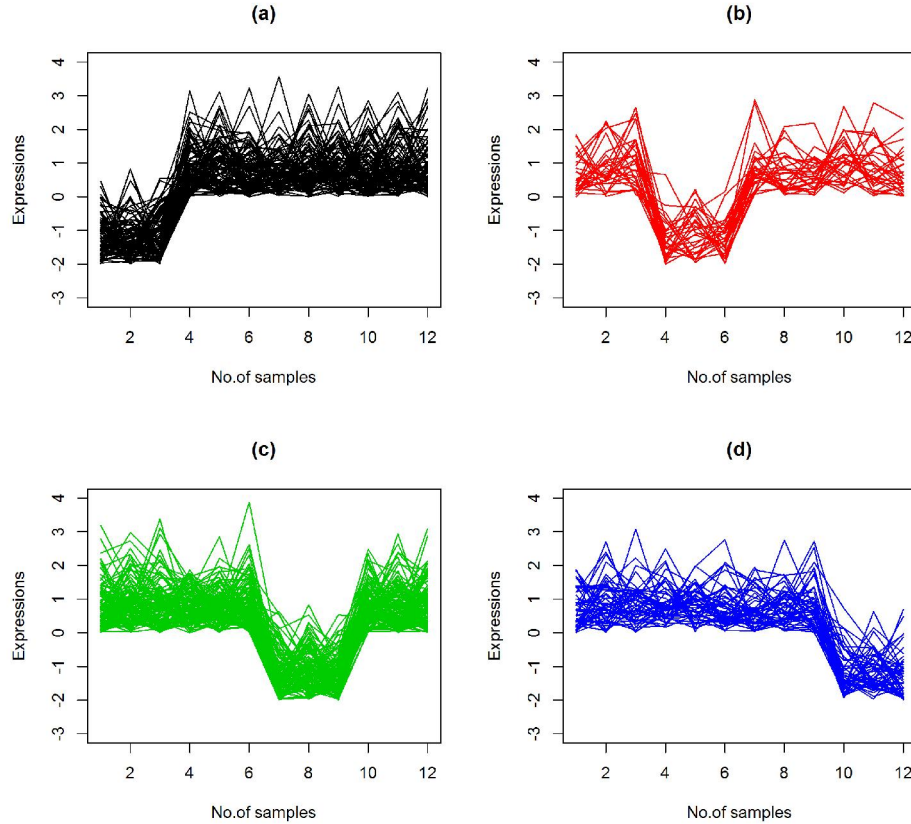

**Figure S4. Four different patterns of DE genes for small-sample case ( $n_1=n_2=n_3=n_4=3$ ).**

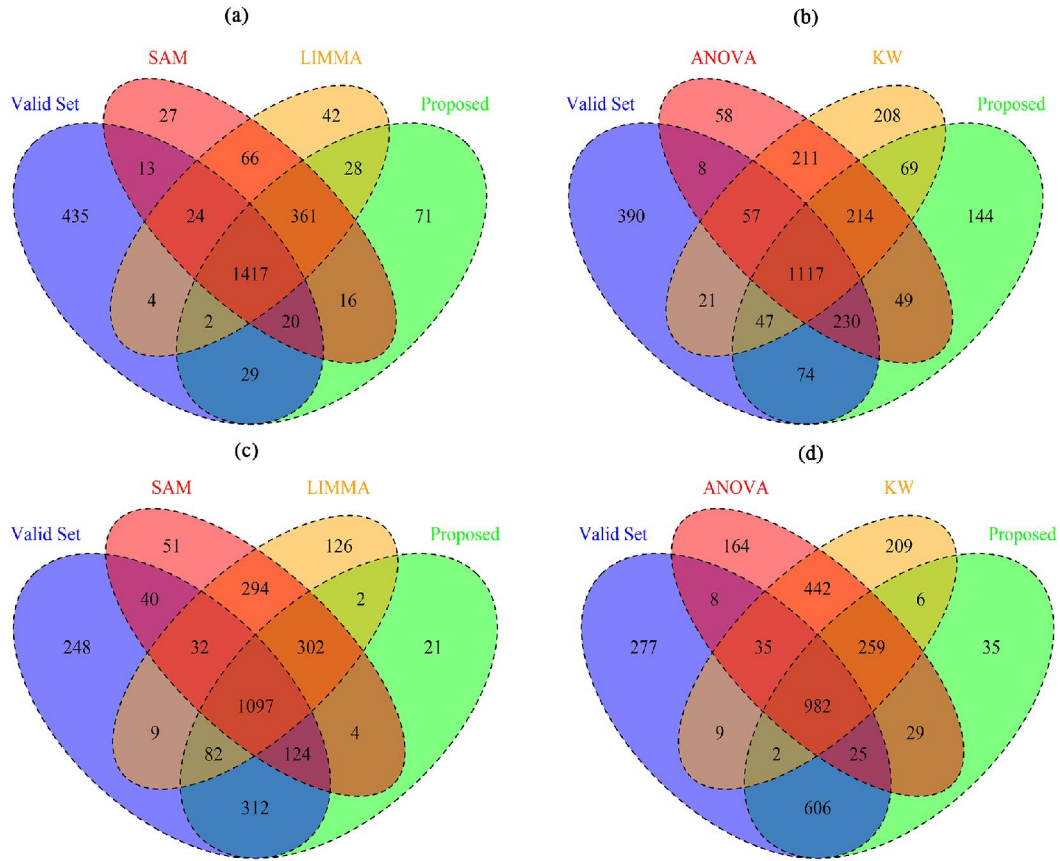

**Figure S5. Comparison of the top 1944 selected genes by five methods with 1944 valid DE gene set for Platinum Spike dataset for small-sample case ( $n_1=n_2=3$ ).** In absence of outliers, Venn diagram of top 1944 genes detected by (a) the SAM, LIMMA and Proposed method or by (b) the ANOVA, KW and Proposed method with 1944 valid DE gene set. In presence of one outlier in 20% of 1944 valid DE genes, Venn diagram of top 1944 genes detected by (c) the SAM, LIMMA and Proposed method or by (d) the ANOVA, KW and Proposed method with 1944 valid DE gene set.



**Table A1. Performance evaluation of different methods based on Spike gene expression dataset.**

| Methods  | In Absence of Outliers                                      |       |       |       |       |
|----------|-------------------------------------------------------------|-------|-------|-------|-------|
|          | TPR                                                         | TNR   | FPR   | FNR   | AUC   |
| ANOVA    | 0.818                                                       | 0.978 | 0.021 | 0.181 | 0.816 |
| KW       | 0.809                                                       | 0.977 | 0.022 | 0.190 | 0.805 |
| SAM      | 0.833                                                       | 0.980 | 0.019 | 0.166 | 0.832 |
| LIMMA    | 0.829                                                       | 0.980 | 0.019 | 0.170 | 0.828 |
| EB       | 0.751                                                       | 0.971 | 0.028 | 0.249 | 0.749 |
| GAGA     | 0.770                                                       | 0.973 | 0.026 | 0.229 | 0.768 |
| BRIDGE   | 0.716                                                       | 0.967 | 0.032 | 0.284 | 0.713 |
| Proposed | 0.833                                                       | 0.980 | 0.019 | 0.167 | 0.833 |
| Methods  | In Presence of Single Outlier in 20% of valid 1944 DE genes |       |       |       |       |
|          | TPR                                                         | TNR   | FPR   | FNR   | AUC   |
| ANOVA    | 0.677                                                       | 0.962 | 0.037 | 0.323 | 0.674 |
| KW       | 0.673                                                       | 0.962 | 0.037 | 0.326 | 0.669 |
| SAM      | 0.736                                                       | 0.971 | 0.031 | 0.261 | 0.733 |
| LIMMA    | 0.680                                                       | 0.963 | 0.037 | 0.320 | 0.678 |
| EB       | 0.641                                                       | 0.958 | 0.041 | 0.358 | 0.638 |
| GAGA     | 0.665                                                       | 0.961 | 0.038 | 0.335 | 0.662 |
| BRIDGE   | 0.832                                                       | 0.982 | 0.018 | 0.158 | 0.832 |
| Proposed | 0.833                                                       | 0.982 | 0.018 | 0.157 | 0.833 |

In this table the summary statistics (TPR, TNR, FPR, FNR and AUC) are estimated by different methods (ANOVA, KW, SAM, LIMMA, EB, GAGA, BRIDGE and Proposed) based on valid 1944 DE genes for both in absence and presence of one outlier in 20% of valid 1944 genes.
