# Supplementary material for: Robust Significance Analysis of Microarrays by Minimum β-Divergence Method
Source: Biomed Res Int. 2017 Jul 27;2017:5310198. doi: 10.1155/2017/5310198 (PMC5551475; doi:10.1155/2017/5310198)
Supplement: Supplementary file 8 [file 5310198.f8.xlsx]

## Sheet: Sheet1
GO (Gene Ontology) Pathways for New 3 DE genes
Database:biological process Name:negative regulation of programmed cell death ID:GO:0043069
C=582; O=2; E=0.12; R=16.76; rawP=0.0046; adjP=0.0491
Index	UserID	Value	Gene Symbol	Gene Name	EntrezGene	Ensembl
1	CTNNA1	NA	CTNNA1	catenin (cadherin-associated protein), alpha 1, 102kDa	1495	ENSG00000044115
2	NFKB1	NA	NFKB1	nuclear factor of kappa light polypeptide gene enhancer in B-cells 1	4790	ENSG00000109320
Database:biological process Name:positive regulation of signal transduction ID:GO:0009967
C=708; O=2; E=0.15; R=13.78; rawP=0.0068; adjP=0.0491
Index	UserID	Value	Gene Symbol	Gene Name	EntrezGene	Ensembl
1	CTNNA1	NA	CTNNA1	catenin (cadherin-associated protein), alpha 1, 102kDa	1495	ENSG00000044115
2	NFKB1	NA	NFKB1	nuclear factor of kappa light polypeptide gene enhancer in B-cells 1	4790	ENSG00000109320
Database:biological process Name:negative regulation of cell death ID:GO:0060548
C=601; O=2; E=0.12; R=16.23; rawP=0.0049; adjP=0.0491
Index	UserID	Value	Gene Symbol	Gene Name	EntrezGene	Ensembl
1	CTNNA1	NA	CTNNA1	catenin (cadherin-associated protein), alpha 1, 102kDa	1495	ENSG00000044115
2	NFKB1	NA	NFKB1	nuclear factor of kappa light polypeptide gene enhancer in B-cells 1	4790	ENSG00000109320
Database:biological process Name:positive regulation of cell communication ID:GO:0010647
C=754; O=2; E=0.15; R=12.94; rawP=0.0077; adjP=0.0491
Index	UserID	Value	Gene Symbol	Gene Name	EntrezGene	Ensembl
1	CTNNA1	NA	CTNNA1	catenin (cadherin-associated protein), alpha 1, 102kDa	1495	ENSG00000044115
2	NFKB1	NA	NFKB1	nuclear factor of kappa light polypeptide gene enhancer in B-cells 1	4790	ENSG00000109320
Database:biological process Name:negative regulation of apoptotic process ID:GO:0043066
C=572; O=2; E=0.12; R=17.05; rawP=0.0045; adjP=0.0491
Index	UserID	Value	Gene Symbol	Gene Name	EntrezGene	Ensembl
1	CTNNA1	NA	CTNNA1	catenin (cadherin-associated protein), alpha 1, 102kDa	1495	ENSG00000044115
2	NFKB1	NA	NFKB1	nuclear factor of kappa light polypeptide gene enhancer in B-cells 1	4790	ENSG00000109320
Database:biological process Name:positive regulation of cell differentiation ID:GO:0045597
C=498; O=2; E=0.10; R=19.59; rawP=0.0034; adjP=0.0491
Index	UserID	Value	Gene Symbol	Gene Name	EntrezGene	Ensembl
1	CTNNA1	NA	CTNNA1	catenin (cadherin-associated protein), alpha 1, 102kDa	1495	ENSG00000044115
2	NFKB1	NA	NFKB1	nuclear factor of kappa light polypeptide gene enhancer in B-cells 1	4790	ENSG00000109320
Database:biological process Name:positive regulation of developmental process ID:GO:0051094
C=682; O=2; E=0.14; R=14.30; rawP=0.0063; adjP=0.0491
Index	UserID	Value	Gene Symbol	Gene Name	EntrezGene	Ensembl
1	CTNNA1	NA	CTNNA1	catenin (cadherin-associated protein), alpha 1, 102kDa	1495	ENSG00000044115
2	NFKB1	NA	NFKB1	nuclear factor of kappa light polypeptide gene enhancer in B-cells 1	4790	ENSG00000109320
Database:biological process Name:positive regulation of signaling ID:GO:0023056
C=752; O=2; E=0.15; R=12.97; rawP=0.0076; adjP=0.0491
Index	UserID	Value	Gene Symbol	Gene Name	EntrezGene	Ensembl
1	CTNNA1	NA	CTNNA1	catenin (cadherin-associated protein), alpha 1, 102kDa	1495	ENSG00000044115
2	NFKB1	NA	NFKB1	nuclear factor of kappa light polypeptide gene enhancer in B-cells 1	4790	ENSG00000109320
Database:biological process Name:positive regulation of response to stimulus ID:GO:0048584
C=1084; O=2; E=0.22; R=9.00; rawP=0.0156; adjP=0.0643
Index	UserID	Value	Gene Symbol	Gene Name	EntrezGene	Ensembl
1	CTNNA1	NA	CTNNA1	catenin (cadherin-associated protein), alpha 1, 102kDa	1495	ENSG00000044115
2	NFKB1	NA	NFKB1	nuclear factor of kappa light polypeptide gene enhancer in B-cells 1	4790	ENSG00000109320
Database:biological process Name:regulation of programmed cell death ID:GO:0043067
C=1167; O=2; E=0.24; R=8.36; rawP=0.0181; adjP=0.0643
Index	UserID	Value	Gene Symbol	Gene Name	EntrezGene	Ensembl
1	CTNNA1	NA	CTNNA1	catenin (cadherin-associated protein), alpha 1, 102kDa	1495	ENSG00000044115
2	NFKB1	NA	NFKB1	nuclear factor of kappa light polypeptide gene enhancer in B-cells 1	4790	ENSG00000109320
Database:molecular function Name:binding ID:GO:0005488
C=11955; O=2; E=2.35; R=0.85; rawP=1.0000; adjP=1.0000
Index	UserID	Value	Gene Symbol	Gene Name	EntrezGene	Ensembl
1	CTNNA1	NA	CTNNA1	catenin (cadherin-associated protein), alpha 1, 102kDa	1495	ENSG00000044115
2	NFKB1	NA	NFKB1	nuclear factor of kappa light polypeptide gene enhancer in B-cells 1	4790	ENSG00000109320
Database:molecular function Name:molecular_function ID:GO:0003674
C=15284; O=3; E=3.00; R=1.00; rawP=1.0000; adjP=1.0000
Index	UserID	Value	Gene Symbol	Gene Name	EntrezGene	Ensembl
1	CTNNA1	NA	CTNNA1	catenin (cadherin-associated protein), alpha 1, 102kDa	1495	ENSG00000044115
2	NFKB1	NA	NFKB1	nuclear factor of kappa light polypeptide gene enhancer in B-cells 1	4790	ENSG00000109320
3	TM4SF1	NA	TM4SF1	transmembrane 4 L six family member 1	4071	ENSG00000169908
Database:molecular function Name:protein binding ID:GO:0005515
C=7337; O=2; E=1.44; R=1.39; rawP=0.4701; adjP=1.0000
Index	UserID	Value	Gene Symbol	Gene Name	EntrezGene	Ensembl
1	CTNNA1	NA	CTNNA1	catenin (cadherin-associated protein), alpha 1, 102kDa	1495	ENSG00000044115
2	NFKB1	NA	NFKB1	nuclear factor of kappa light polypeptide gene enhancer in B-cells 1	4790	ENSG00000109320
Database:cellular component Name:plasma membrane ID:GO:0005886
C=4289; O=2; E=0.75; R=2.65; rawP=0.1579; adjP=0.4300
Index	UserID	Value	Gene Symbol	Gene Name	EntrezGene	Ensembl
1	CTNNA1	NA	CTNNA1	catenin (cadherin-associated protein), alpha 1, 102kDa	1495	ENSG00000044115
2	TM4SF1	NA	TM4SF1	transmembrane 4 L six family member 1	4071	ENSG00000169908
Database:cellular component Name:plasma membrane part ID:GO:0044459
C=1918; O=2; E=0.34; R=5.93; rawP=0.0351; adjP=0.4300
Index	UserID	Value	Gene Symbol	Gene Name	EntrezGene	Ensembl
1	CTNNA1	NA	CTNNA1	catenin (cadherin-associated protein), alpha 1, 102kDa	1495	ENSG00000044115
2	TM4SF1	NA	TM4SF1	transmembrane 4 L six family member 1	4071	ENSG00000169908
Database:cellular component Name:macromolecular complex ID:GO:0032991
C=3864; O=2; E=0.68; R=2.94; rawP=0.1307; adjP=0.4300
Index	UserID	Value	Gene Symbol	Gene Name	EntrezGene	Ensembl
1	CTNNA1	NA	CTNNA1	catenin (cadherin-associated protein), alpha 1, 102kDa	1495	ENSG00000044115
2	NFKB1	NA	NFKB1	nuclear factor of kappa light polypeptide gene enhancer in B-cells 1	4790	ENSG00000109320
Database:cellular component Name:cytosol ID:GO:0005829
C=2372; O=2; E=0.42; R=4.79; rawP=0.0526; adjP=0.4300
Index	UserID	Value	Gene Symbol	Gene Name	EntrezGene	Ensembl
1	CTNNA1	NA	CTNNA1	catenin (cadherin-associated protein), alpha 1, 102kDa	1495	ENSG00000044115
2	NFKB1	NA	NFKB1	nuclear factor of kappa light polypeptide gene enhancer in B-cells 1	4790	ENSG00000109320
Database:cellular component Name:protein complex ID:GO:0043234
C=3278; O=2; E=0.58; R=3.47; rawP=0.0966; adjP=0.4300
Index	UserID	Value	Gene Symbol	Gene Name	EntrezGene	Ensembl
1	CTNNA1	NA	CTNNA1	catenin (cadherin-associated protein), alpha 1, 102kDa	1495	ENSG00000044115
2	NFKB1	NA	NFKB1	nuclear factor of kappa light polypeptide gene enhancer in B-cells 1	4790	ENSG00000109320
Database:cellular component Name:cell periphery ID:GO:0071944
C=4377; O=2; E=0.77; R=2.60; rawP=0.1638; adjP=0.4300
Index	UserID	Value	Gene Symbol	Gene Name	EntrezGene	Ensembl
1	CTNNA1	NA	CTNNA1	catenin (cadherin-associated protein), alpha 1, 102kDa	1495	ENSG00000044115
2	TM4SF1	NA	TM4SF1	transmembrane 4 L six family member 1	4071	ENSG00000169908
Database:cellular component Name:non-membrane-bounded organelle ID:GO:0043228
C=3800; O=2; E=0.67; R=2.99; rawP=0.1268; adjP=0.4300
Index	UserID	Value	Gene Symbol	Gene Name	EntrezGene	Ensembl
1	CTNNA1	NA	CTNNA1	catenin (cadherin-associated protein), alpha 1, 102kDa	1495	ENSG00000044115
2	NFKB1	NA	NFKB1	nuclear factor of kappa light polypeptide gene enhancer in B-cells 1	4790	ENSG00000109320
Database:cellular component Name:intracellular non-membrane-bounded organelle ID:GO:0043232
C=3800; O=2; E=0.67; R=2.99; rawP=0.1268; adjP=0.4300
Index	UserID	Value	Gene Symbol	Gene Name	EntrezGene	Ensembl
1	CTNNA1	NA	CTNNA1	catenin (cadherin-associated protein), alpha 1, 102kDa	1495	ENSG00000044115
2	NFKB1	NA	NFKB1	nuclear factor of kappa light polypeptide gene enhancer in B-cells 1	4790	ENSG00000109320
Database:cellular component Name:membrane part ID:GO:0044425
C=6154; O=2; E=1.08; R=1.85; rawP=0.2967; adjP=0.6923
Index	UserID	Value	Gene Symbol	Gene Name	EntrezGene	Ensembl
1	CTNNA1	NA	CTNNA1	catenin (cadherin-associated protein), alpha 1, 102kDa	1495	ENSG00000044115
2	TM4SF1	NA	TM4SF1	transmembrane 4 L six family member 1	4071	ENSG00000169908
Database:cellular component Name:cytoplasmic part ID:GO:0044444
C=6772; O=2; E=1.19; R=1.68; rawP=0.3478; adjP=0.7304
Index	UserID	Value	Gene Symbol	Gene Name	EntrezGene	Ensembl
1	CTNNA1	NA	CTNNA1	catenin (cadherin-associated protein), alpha 1, 102kDa	1495	ENSG00000044115
2	NFKB1	NA	NFKB1	nuclear factor of kappa light polypeptide gene enhancer in B-cells 1	4790	ENSG00000109320
C: the number of reference genes in the category
O: the number of genes in the gene set and also in the category
E: the expected number in the category
R: ratio of enrichment
rawP: p value from hypergeometric test
adjP: p value adjusted by the multiple test adjustment
