# Supplementary material for: Robust Significance Analysis of Microarrays by Minimum β-Divergence Method
Source: Biomed Res Int. 2017 Jul 27;2017:5310198. doi: 10.1155/2017/5310198 (PMC5551475; doi:10.1155/2017/5310198)
Supplement: Supplementary file 9 [file 5310198.f9.xlsx]

## Sheet: Sheet1
KEGG (Kyoto Encyclopedia of Genes and Genomes) Pathways for New 3 DE genes
Database:KEGG pathway Name:Pathways in cancer ID:05200
C=326; O=2; E=0.02; R=88.19; rawP=0.0002; adjP=0.0002
Index	UserID	Value	Gene Symbol	Gene Name	EntrezGene	Ensembl
1	CTNNA1	NA	CTNNA1	catenin (cadherin-associated protein), alpha 1, 102kDa	1495	ENSG00000044115
2	NFKB1	NA	NFKB1	nuclear factor of kappa light polypeptide gene enhancer in B-cells 1	4790	ENSG00000109320
C: the number of reference genes in the category
O: the number of genes in the gene set and also in the category
E: the expected number in the category
R: ratio of enrichment
rawP: p value from hypergeometric test
adjP: p value adjusted by the multiple test adjustment
